# Supplementary material for: Quantifying social contact patterns in Minnesota during Stay-at-Home social distancing order
Source: bioRxiv or medRxiv preprint supplement (doi:10.1101/2021.07.12.21260216), 2021-07-15

## Appendix A.

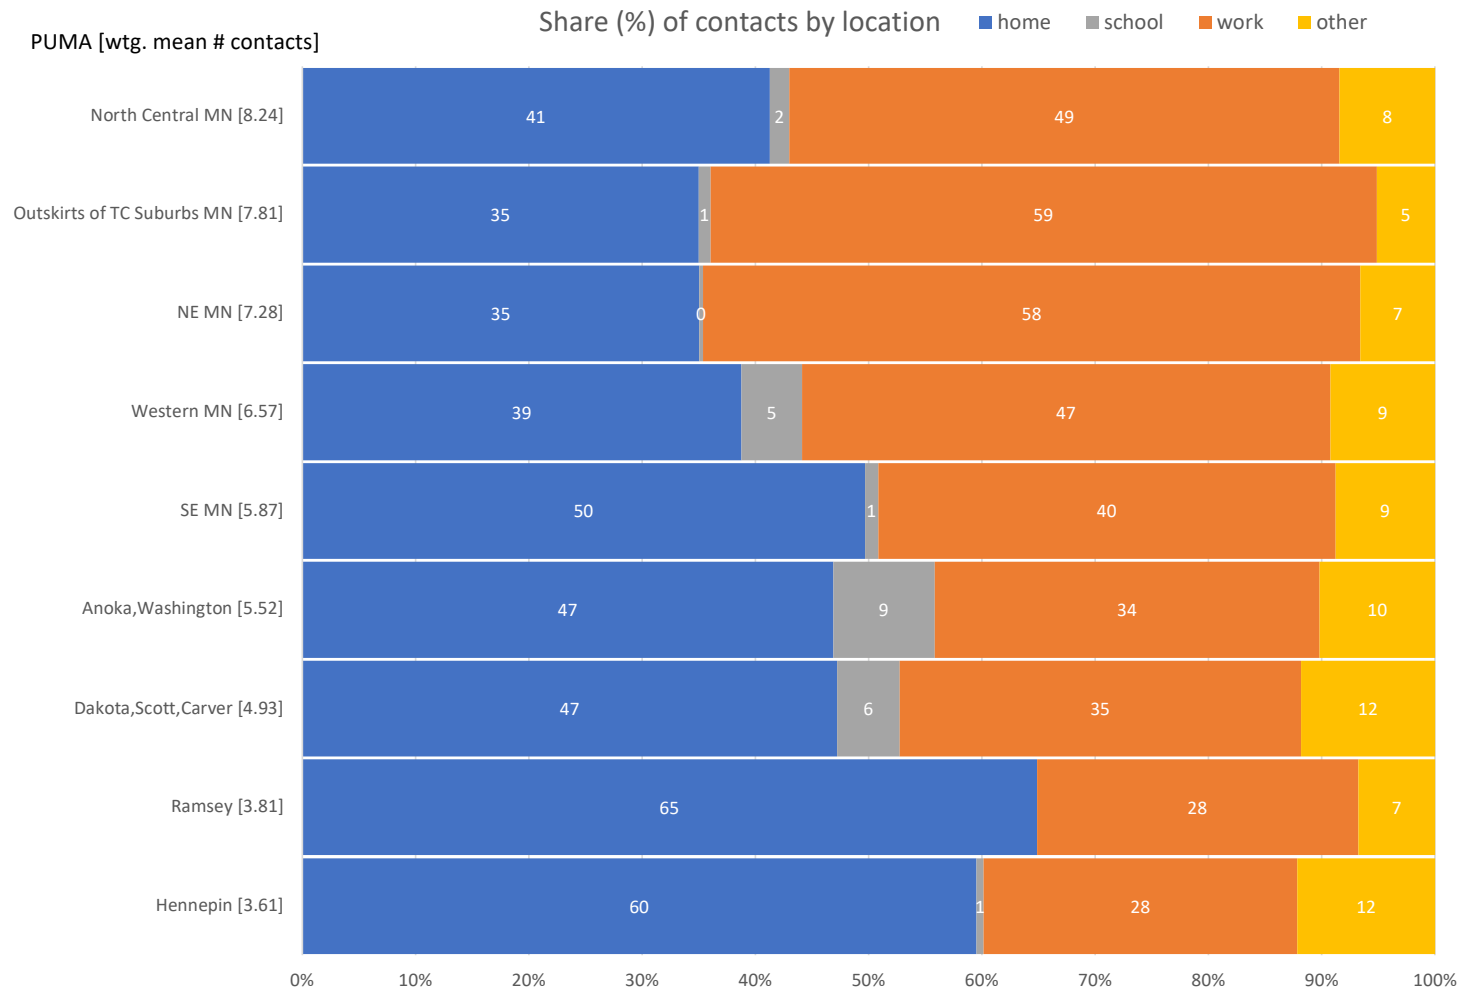

Supplement: Supplementary file [file media-1.pdf]
