# Supplementary material for: Quantifying social contact patterns in Minnesota during Stay-at-Home social distancing order
Source: bioRxiv or medRxiv preprint supplement (doi:10.1101/2021.07.12.21260216), 2021-07-15
Supplement: Supplementary file [file media-2.pdf]

**Appendix B1.** Comparing UK POLYMOD and MN SCS Wave 1 contact matrices. In the percentage change matrix, if there was an increase in number of contacts during the SAH order, that value is coded in blue, if there was a decrease that value is in red.

UK POLYMOD (Q = 0.18)

|                 |         |                        |         |         |         |         |         |         |         |
|-----------------|---------|------------------------|---------|---------|---------|---------|---------|---------|---------|
| Age of Contacts | 80+     | 0.02                   | 0.02    | 0.05    | 0.05    | 0.20    | 0.29    | 0.20    | 0.24    |
|                 | [70,80) | 0.12                   | 0.13    | 0.15    | 0.24    | 0.40    | 0.34    | 0.34    | 1.10    |
|                 | [60,70) | 0.36                   | 0.37    | 0.47    | 0.62    | 0.68    | 0.82    | 1.17    | 1.21    |
|                 | [50,60) | 0.61                   | 0.70    | 1.10    | 1.21    | 1.35    | 1.86    | 1.43    | 0.93    |
|                 | [40,50) | 1.20                   | 1.71    | 1.75    | 1.73    | 2.90    | 1.48    | 1.51    | 1.41    |
|                 | [30,40) | 2.02                   | 1.73    | 1.89    | 2.76    | 2.18    | 1.55    | 1.72    | 0.45    |
|                 | [20,30) | 1.10                   | 1.17    | 3.60    | 1.52    | 1.62    | 1.63    | 1.17    | 0.69    |
|                 | [10,20) | 1.25                   | 8.06    | 1.44    | 1.12    | 1.85    | 0.89    | 0.59    | 1.00    |
|                 | [0,10)  | 5.15                   | 1.23    | 1.27    | 1.94    | 0.79    | 0.56    | 0.71    | 0.28    |
|                 |         | [0,10)                 | [10,20) | [20,30) | [30,40) | [40,50) | [50,60) | [60,70) | [70,80) |
|                 |         | Respondent's Age Group |         |         |         |         |         |         |         |

MN W1 matrix (Q = 0.21)

|                 |         |                        |         |         |         |         |         |         |         |
|-----------------|---------|------------------------|---------|---------|---------|---------|---------|---------|---------|
| Age of Contacts | 80+     | 0.01                   | 0.01    | 0.02    | 0.06    | 0.11    | 0.09    | 0.06    | 0.20    |
|                 | [70,80) | 0.06                   | 0.06    | 0.06    | 0.09    | 0.14    | 0.17    | 0.18    | 0.59    |
|                 | [60,70) | 0.15                   | 0.17    | 0.38    | 0.49    | 0.44    | 0.64    | 1.01    | 0.32    |
|                 | [50,60) | 0.13                   | 0.53    | 0.88    | 0.71    | 0.80    | 1.60    | 0.69    | 0.31    |
|                 | [40,50) | 0.45                   | 1.00    | 0.57    | 0.87    | 1.67    | 0.76    | 0.44    | 0.25    |
|                 | [30,40) | 0.97                   | 0.39    | 0.70    | 1.37    | 0.98    | 0.75    | 0.56    | 0.18    |
|                 | [20,30) | 0.21                   | 0.33    | 1.75    | 0.66    | 0.60    | 0.87    | 0.40    | 0.12    |
|                 | [10,20) | 0.36                   | 1.36    | 0.33    | 0.36    | 1.04    | 0.51    | 0.17    | 0.11    |
|                 | [0,10)  | 1.69                   | 0.37    | 0.21    | 0.91    | 0.48    | 0.13    | 0.17    | 0.11    |
|                 |         | [0,10)                 | [10,20) | [20,30) | [30,40) | [40,50) | [50,60) | [60,70) | [70,80) |
|                 |         | Respondent's Age Group |         |         |         |         |         |         |         |

Percentage Change matrix

|                 |         |                        |         |         |         |         |         |         |         |
|-----------------|---------|------------------------|---------|---------|---------|---------|---------|---------|---------|
| Age of Contacts | 80+     | 0.29                   | 0.65    | 0.67    | -0.03   | 0.43    | 0.71    | 0.72    | 0.16    |
|                 | [70,80) | 0.52                   | 0.52    | 0.58    | 0.62    | 0.65    | 0.50    | 0.47    | 0.46    |
|                 | [60,70) | 0.57                   | 0.56    | 0.19    | 0.20    | 0.36    | 0.21    | 0.14    | 0.74    |
|                 | [50,60) | 0.78                   | 0.24    | 0.20    | 0.41    | 0.40    | 0.14    | 0.51    | 0.66    |
|                 | [40,50) | 0.62                   | 0.41    | 0.68    | 0.50    | 0.42    | 0.49    | 0.71    | 0.82    |
|                 | [30,40) | 0.52                   | 0.77    | 0.63    | 0.50    | 0.55    | 0.52    | 0.68    | 0.61    |
|                 | [20,30) | 0.81                   | 0.71    | 0.51    | 0.56    | 0.63    | 0.47    | 0.66    | 0.83    |
|                 | [10,20) | 0.71                   | 0.83    | 0.77    | 0.68    | 0.44    | 0.42    | 0.71    | 0.89    |
|                 | [0,10)  | 0.67                   | 0.70    | 0.84    | 0.53    | 0.39    | 0.76    | 0.77    | 0.61    |
|                 |         | [0,10)                 | [10,20) | [20,30) | [30,40) | [40,50) | [50,60) | [60,70) | [70,80) |
|                 |         | Respondent's Age Group |         |         |         |         |         |         |         |

Fewer reduction in contacts for working-age adults (mean change = 43%)
