# Supplementary material for: Quantifying social contact patterns in Minnesota during Stay-at-Home social distancing order
Source: bioRxiv or medRxiv preprint supplement (doi:10.1101/2021.07.12.21260216), 2021-07-15

**Appendix B2.** Comparing US Synthetic and MN SCS Wave 1 contact matrices. In the percentage change matrix, if there was an increase in number of contacts during the SAH order, that value is coded in blue, if there was a decrease that value is in red.

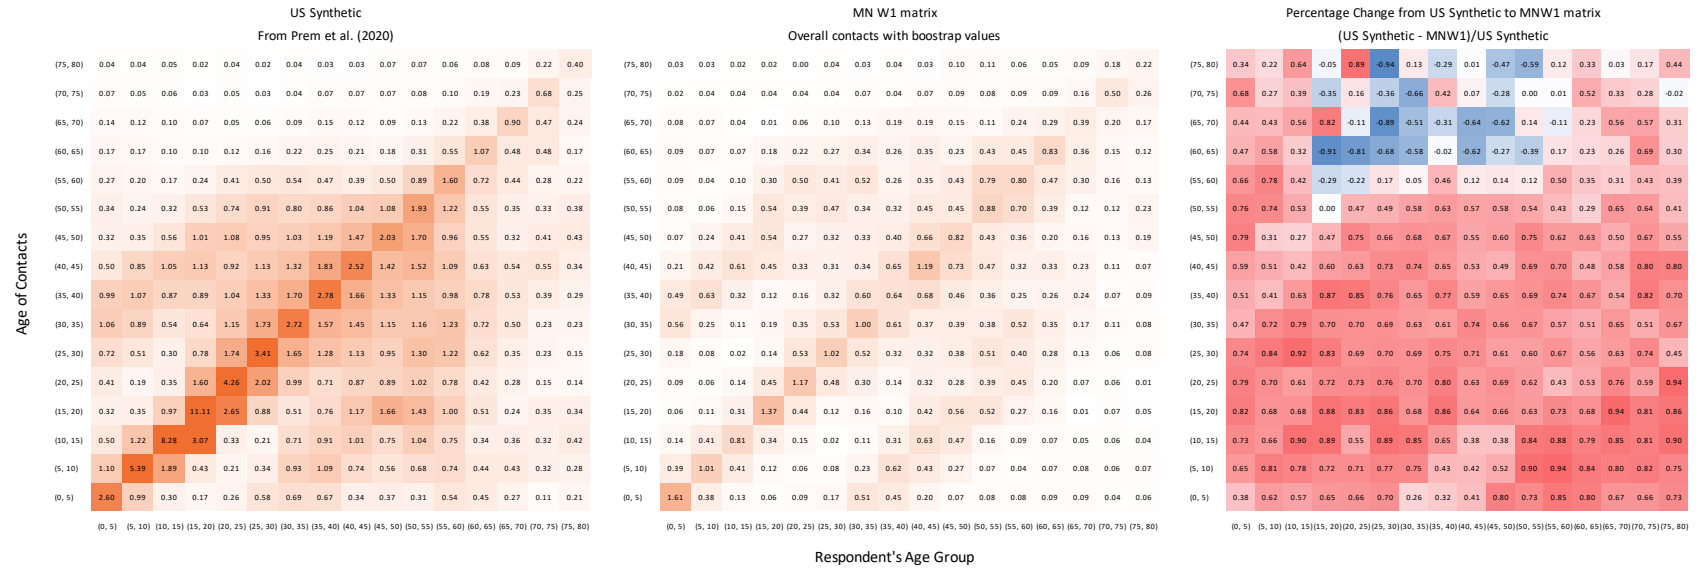

Supplement: Supplementary file [file media-3.pdf]
